# Supplementary material for: Impaired peroxisomal import in Drosophila oenocytes causes cardiac dysfunction by inducing upd3 as a peroxikine
Source: PubMed Central journal article supplement (PMC7286907; doi:10.1038/s41467-020-16781-w), 2020-06-10
Supplement: 41467_2020_16781_MOESM1_ESM.pdf [file 41467_2020_16781_MOESM1_ESM.pdf]

## Supplementary Information for

### **Impaired peroxisomal import in *Drosophila* hepatocyte-like cells causes cardiac dysfunction by inducing upd3 as a peroxikine**

Kerui Huang<sup>1</sup>, Ting Miao<sup>1</sup>, Kai Chang<sup>1</sup>, Jinoh Kim<sup>1</sup>, Ping Kang<sup>1</sup>, Qiuhan Jiang<sup>1</sup>, Andrew J. Simmonds<sup>2</sup>, Francesca Di Cara<sup>3</sup>, Hua Bai<sup>1\*</sup>

1 Department of Genetics, Development, and Cell Biology, Iowa State University, Ames, IA 50011, USA

2 Department of Cell Biology, University of Alberta, Edmonton, AB T6G 2H7, Canada.

3 Department of Microbiology & Immunology, Dalhousie University, Halifax, NS B3H4R2, Canada.

## Supplementary Fig. 1

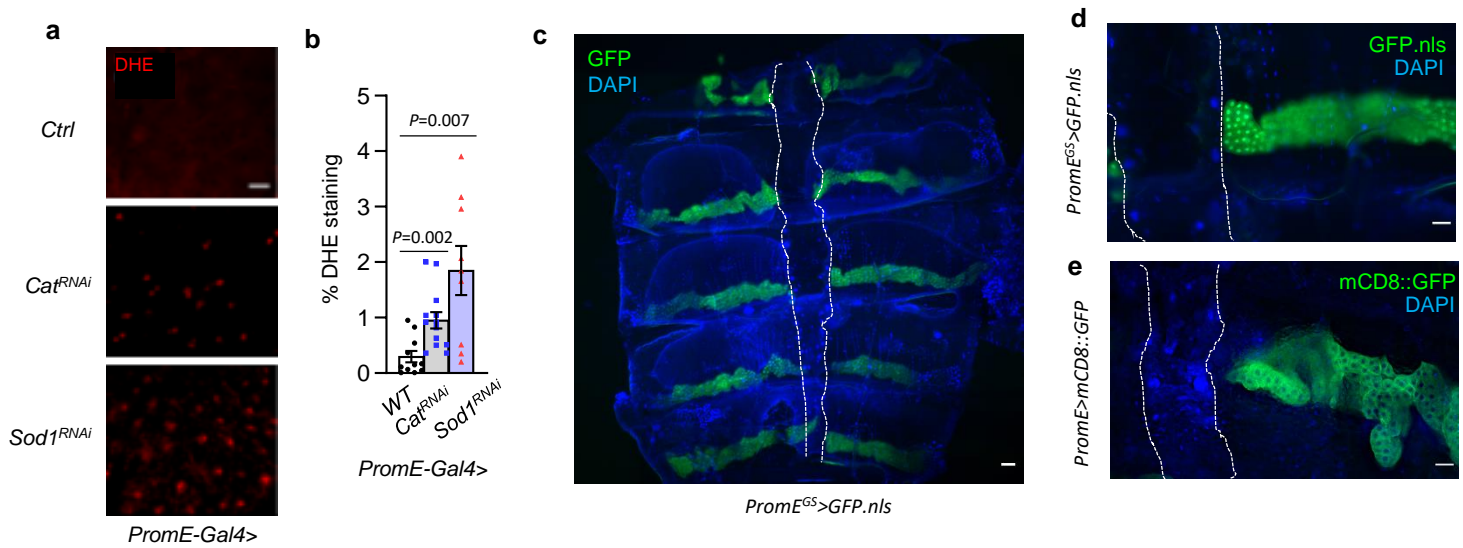

**Supplementary Fig. 1 a** DHE staining and PromE-gal4 specificity. Representative images to show DHE staining in oenocytes dissected from control and oenocyte-specific *Sod1* KD flies (*PromE-Gal4>UAS-Sod1<sup>RNAi</sup>*). Hoechst 33342 was used for nuclear staining. Scale bar: 20  $\mu$ m. **b** Quantification of relative DHE staining in control and oenocyte-specific *Sod1* KD flies (*PromE-Gal4>UAS-Cat<sup>RNAi</sup>*). Data are represented as mean  $\pm$  SEM. *P* values are calculated using one-way ANOVA followed by Holm-sidak multiple comparisons, ns: not significant. *n* = 5 flies, 2 ROI per replicate. **c, d, e** Verification of oenocyte-specific driver (*PromE-Gal4*), oenocyte-specific GeneSwitch driver (*PromE<sup>GS</sup>-Gal4*). *n* = 5 flies. RU: mifepristone (RU486). Dashed line delineate cardiac cells. Scale bar: 20  $\mu$ m. Source data are provided as a Source Data file.

**Supplementary Fig. 2**

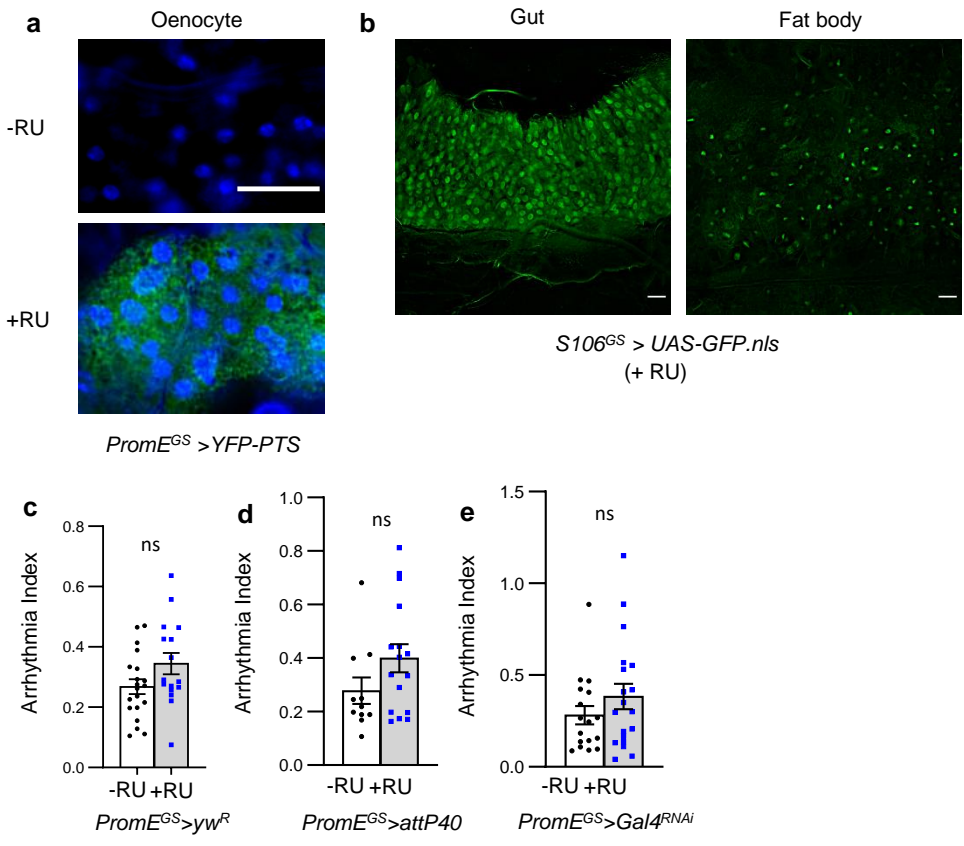

**Supplementary Fig. 2 a** Verification of oenocyte-specific GeneSwitch driver (*PromEGS-Gal4*). RU: mifepristone (RU486). **b** Verification of fat body/gut-specific GeneSwitch driver (*S106GS-Gal4*). Scale bar: 20  $\mu$ m. n = 5 flies. Data presented here are representative of two independent experiments. **c, d, e** The effect of RU486 feeding on arrhythmia of three wild-type flies ( $n_{\text{left-right}} = 20, 16, 11, 16, 17, 19$  flies). *P* values are calculated using two-sided unpaired *t*-test. Source data are provided as a Source Data file. For specific statistical number, please refer to the source data.

### Supplementary Fig. 3

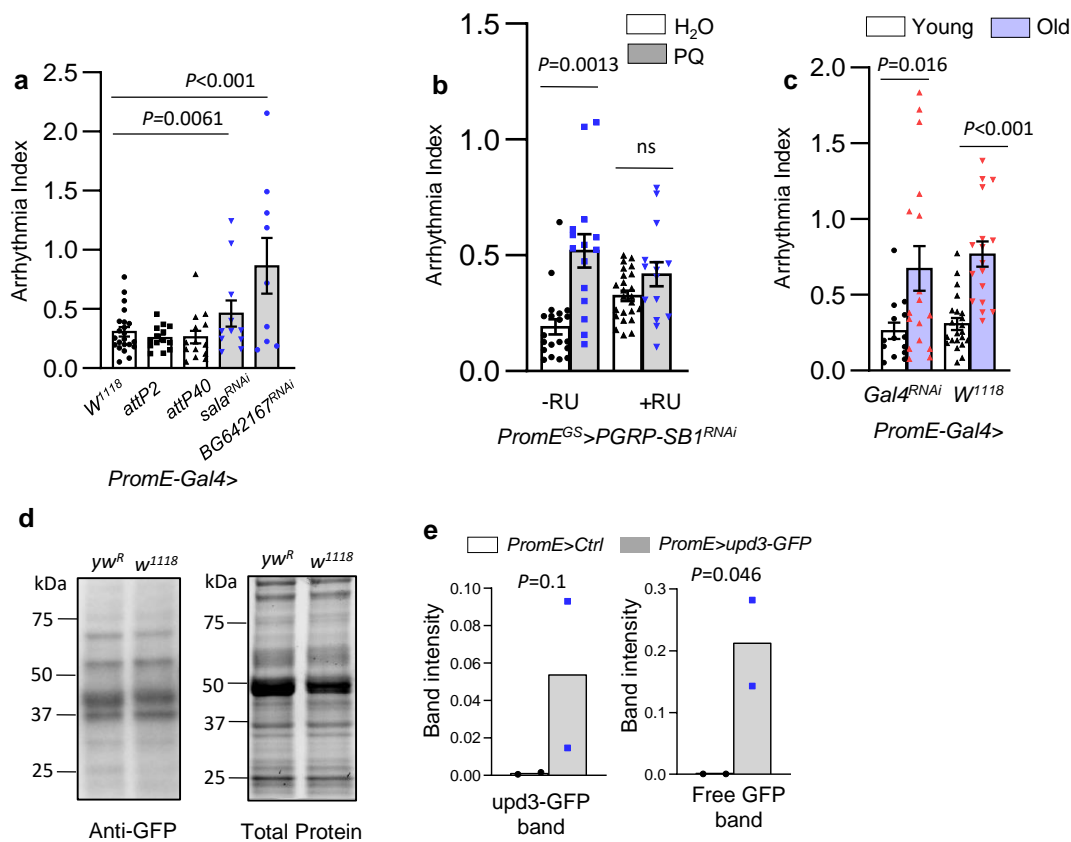

**Supplementary Fig. 3a** Arrhythmia index of wild-type flies (*PromE-Gal4>w<sup>1118</sup>*, *PromE-Gal4>AttP2*, *PromE-Gal4>attP40*) and oenocyte-specific knockdown of *sala* and *BG642167* ( $n_{\text{left-right}} = 14, 14, 22, 11, 9$  flies). **b** Paraquat (PQ)-induced arrhythmia measured by SOHA for *PGRP-SB1* knockdown under oenocyte-specific GeneSwitch driver (*PromE<sup>GS</sup>-Gal4>PGRP-SB1<sup>RNAi</sup>*) ( $n_{\text{left-right}} = 20, 15, 24, 15$  flies). **c** Arrhythmia index of wild-type flies (*PromE-Gal4>UAS-Gal4<sup>RNAi</sup>* and *PromE-Gal4>w<sup>1118</sup>*) at young (2-week-old) and old age (6-week-old), ( $n_{\text{left-right}} = 14, 17, 22, 17$  flies). Data are represented as mean  $\pm$  SEM.  $P$  values are calculated using one-way ANOVA, followed by Holm-sidak multiple comparisons ns: not significant. **d** Western blot analysis on the protein extracts from the whole body of two wild-type flies, *yw<sup>R</sup>* and *w<sup>1118</sup>*. Total protein loaded onto the Bio-Rad Stain-Free gel was visualized using ChemiDoc MP Imagers after UV activation. **e** Quantification of western blots in **Fig 3j**. The data represent the intensity of GFP bands normalized to the total protein. Source data are provided as a Source Data file. Data presented here are representative of two independent experiments. For specific statistical number, please refer to the source data.

**Supplementary Fig. 4**

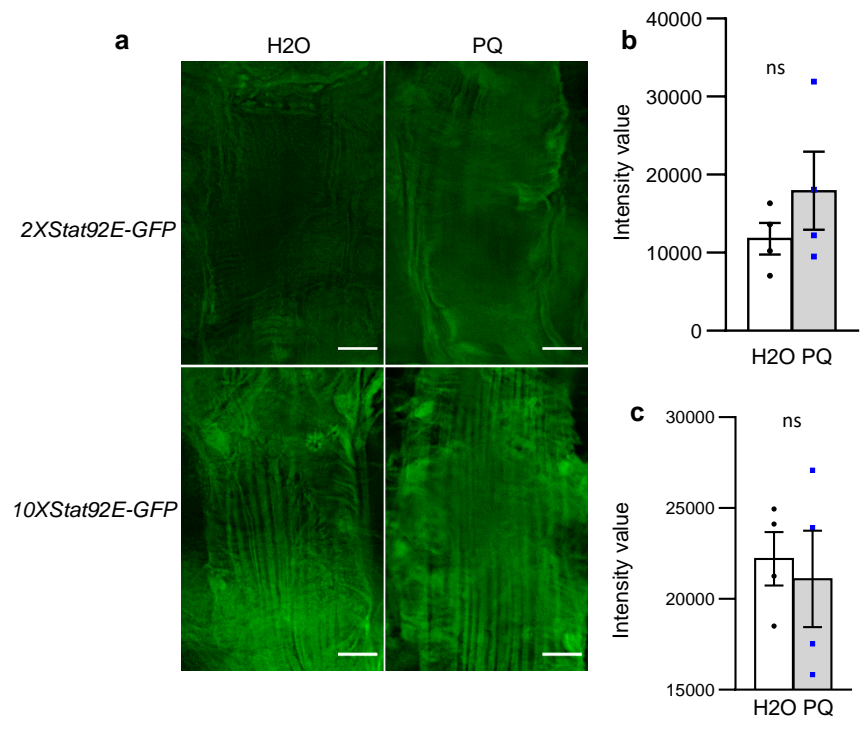

**Supplementary Fig. 4 a** Representative images of *2XStat92E-GFP* or *10XStat92E-GFP* reporters under paraquat feeding condition or water fed conditions. Scale bar: 20  $\mu$ m. **b, c** Quantification of reporter staining in Panel, n = 4 flies. *P* values are calculated using two-sided unpaired *t*-test. **a**. Source data are provided as a Source Data file.

**Supplementary Fig. 5**

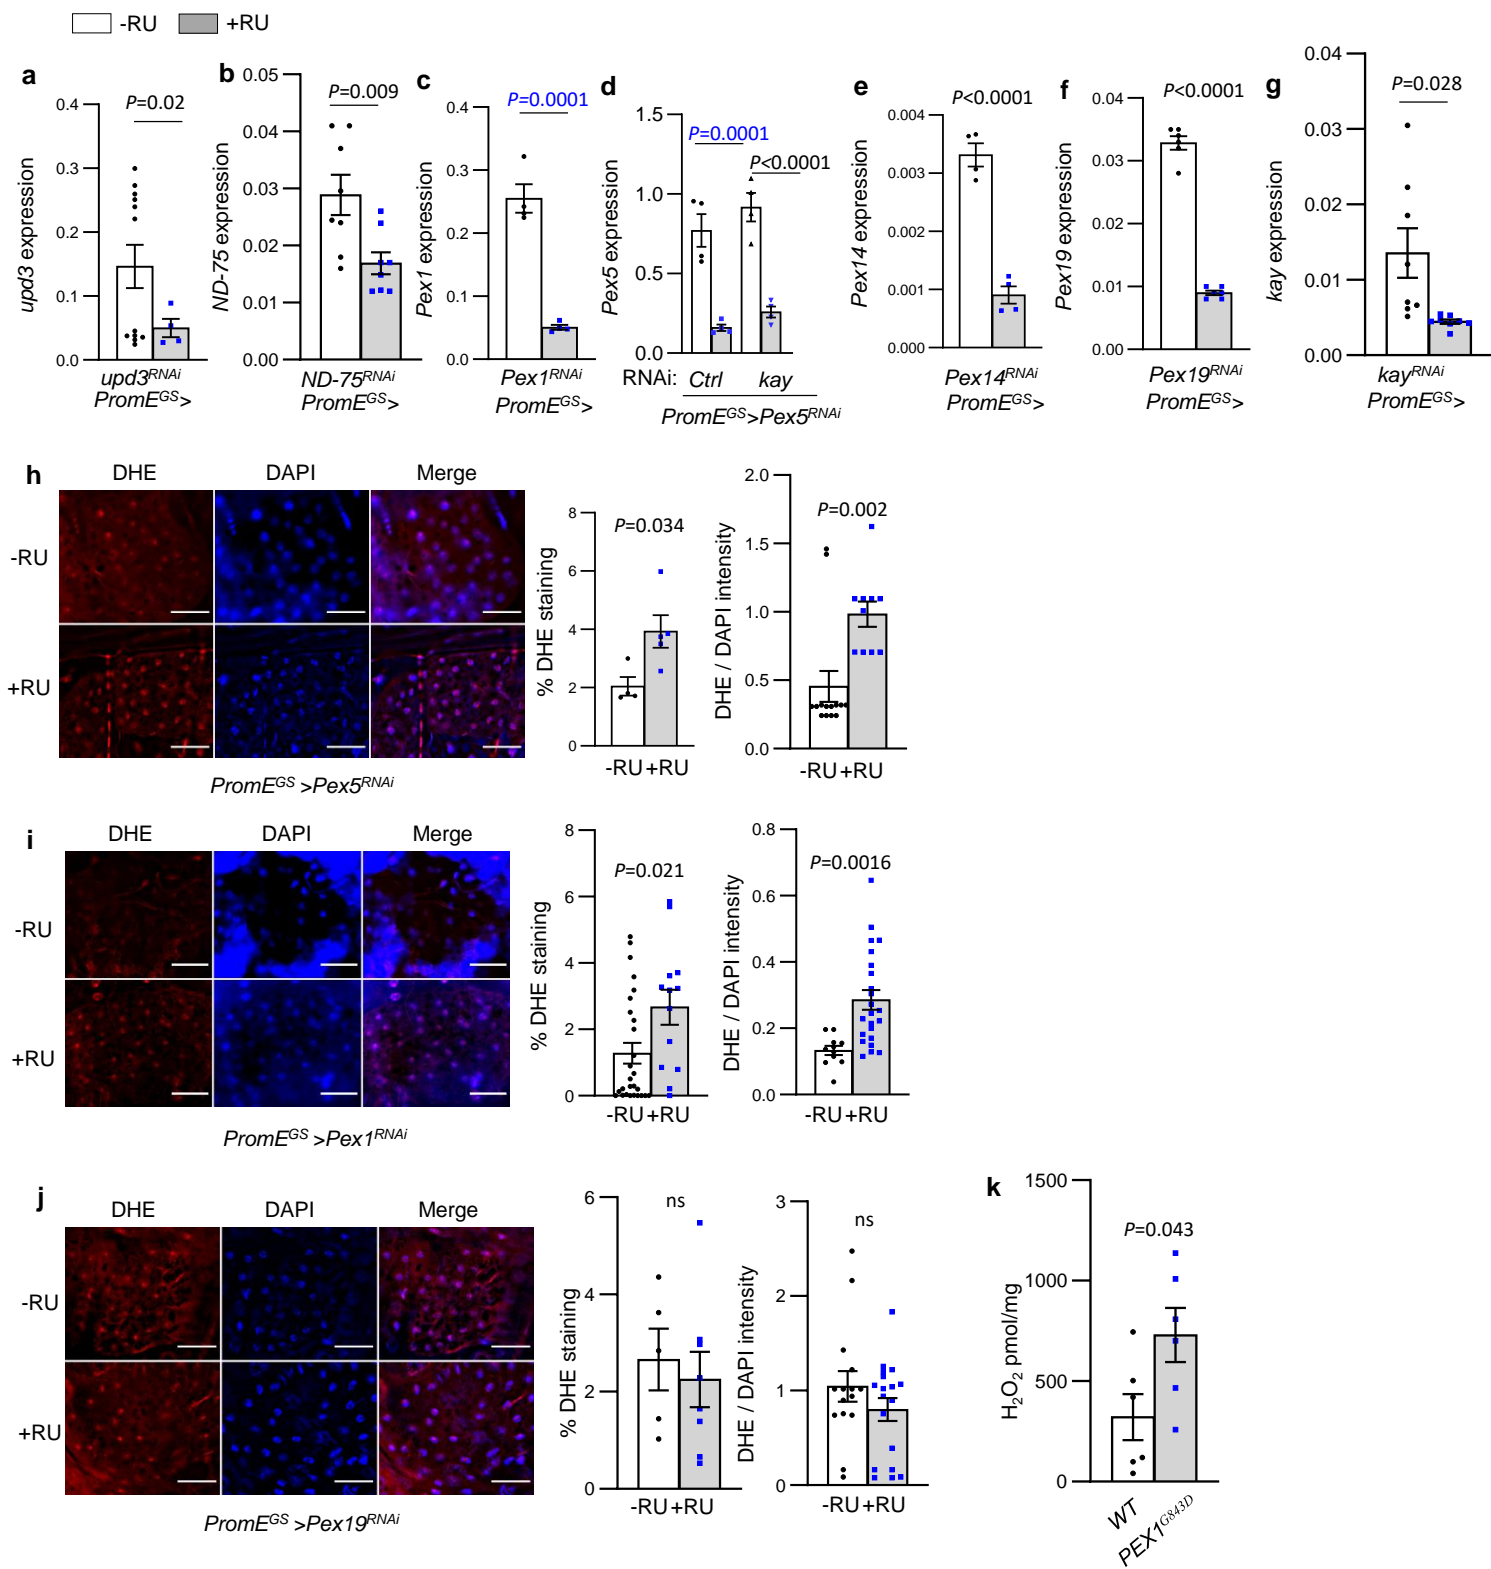

**Supplementary Fig. 5** RNAi knockdown verification by QRT-PCR for *upd3* (a), *ND-75* (b), *Pex1* (c), *Pex5* (d), *Pex14* (e), *Pex19* (f), *kay* (g). Oenocyte-specific GeneSwitch driver (*Prom<sup>EGS</sup>-Gal4*) was used. RU: mifepristone (RU486). a-e, g n = 4 biological samples. f n = 3 biological samples. ROS quantification in oenocyte-specific *Pex5* KD (h), *Pex1* KD (i), *Pex19* KD (j). % DHE-positive area per ROI or DHE intensity normalized to DAPI was analyzed. Scale bar: 20  $\mu$ m. n = 4 flies. k *H<sub>2</sub>O<sub>2</sub>* levels measured by Amplex Red in WT and PEX1-G843D human fibroblast cells. N = 6 biological samples. Data are represented as mean  $\pm$  SEM. *P* values are calculated using unpaired *t*-test (a-c, e-g, h-k), one-way ANOVA, followed by Holm-sidak multiple comparisons (d). ns: not significant. Source data are provided as a Source Data file. For statistical number, please refer to the source data.

Supplementary Fig. 6 Uncropped Original Scans

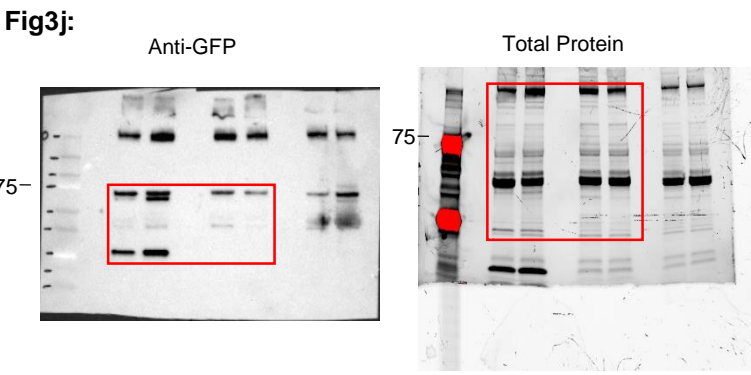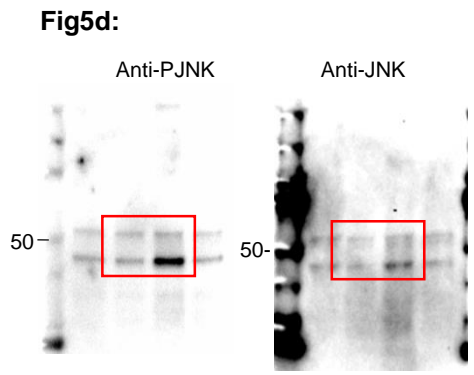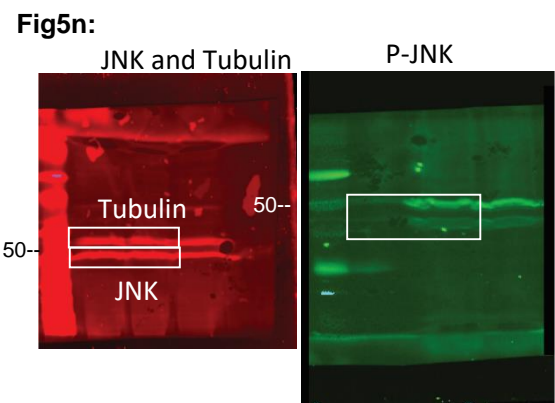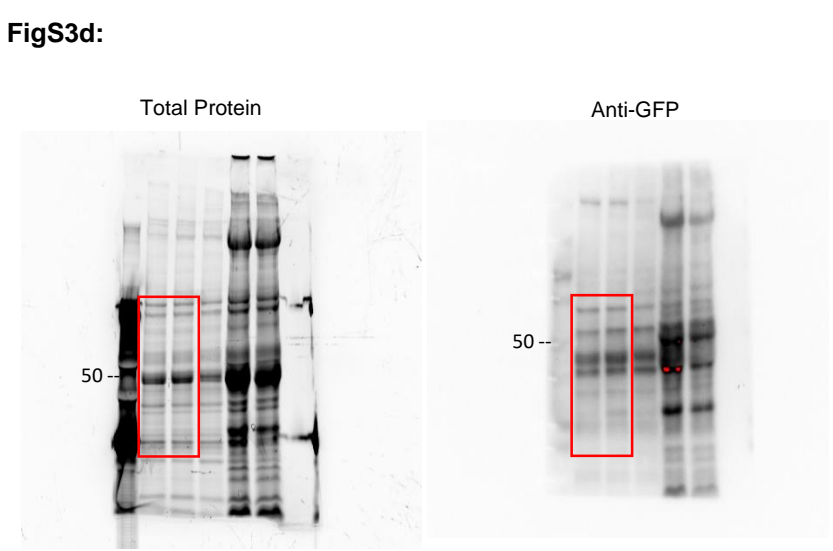

Supplementary Fig. 6 Uncropped and unprocessed gel or blots for fig 3j, fig5d, 5n and supplementary fig3d.

**Supplementary Table 1: KEY RESOURCES TABLE**

| REAGENT OR RESOURCE                                                           | SOURCE                              | IDENTIFIER  |
|-------------------------------------------------------------------------------|-------------------------------------|-------------|
| <b>Antibodies</b>                                                             |                                     |             |
| Rabbit anti-Stat92E                                                           | A gift from Steven X. Hou           | N/A         |
| Rabbit anti-GFP                                                               | Cell Signaling Technology           | 2956S       |
| Guinea Pig anti-Pmp70                                                         | A gift from Kyu-Sun Lee             | N/A         |
| Rabbit anti-Pmp70                                                             | This study, by Andrew Simmonds      | N/A         |
| Rabbit anti-SKL                                                               | A gift from Richard Rachubinski     | N/A         |
| Rabbit anti-P-JNK                                                             | Cell Signaling Technology           | 4668S       |
| Rabbit anti-P-JNK                                                             | Cell Signaling Technology           | 9255        |
| Rabbit anti-JNK                                                               | Cell Signaling Technology           | 9252        |
| Rabbit anti-Tubulin                                                           | Sigma                               | T5168       |
| Goat anti-Rabbit IgG-HRP                                                      | Jackson ImmunoResearch              | 111-035-003 |
| Alexa Fluor® 488 AffiniPure Donkey Anti-Rabbit IgG (H+L)                      | Jackson ImmunoResearch              | 711-545-152 |
| Alexa Fluor® 594 AffiniPure Donkey Anti-Guinea Pig IgG (H+L)                  | Jackson ImmunoResearch              | 706-585-148 |
| <b>Chemicals</b>                                                              |                                     |             |
| Paraquat (PQ)                                                                 | Sigma                               | 36541-100M  |
| Mifepristone (RU486)                                                          | Fisher Scientific                   | NC988828    |
| 16% Paraformaldehyde                                                          | Fisher Scientific                   | 50980487    |
| Hoechst 33342                                                                 | ImmunoChemistry Technologies        | N/A         |
| ECL Western Blotting Substrate                                                | Thermo Scientific                   | TD266065    |
| 2-Mercaptoethanol                                                             | Bio-Rad                             | 161-0710    |
| 2X Laemmli sample buffer                                                      | Bio-Rad                             | 161-0737    |
| ProLong Gold antifade reagent                                                 | Fisher Scientific                   | S36937      |
| <b>Critical Commercial Assays</b>                                             |                                     |             |
| Dihydroethidium (DHE)                                                         | Fisher Scientific                   | 30980025MG  |
| Cells-to-CT kits                                                              | Thermo Scientific                   | 4402954     |
| iScript™ cDNA Synthesis Kit                                                   | Bio-Rad                             | 170-8891    |
| Mini-PROTEAN TGX Stain-Free Precast Gels                                      | Bio-Rad                             | 456-8085    |
| Amplex Red                                                                    | Fisher Scientific                   | A22188      |
| POWERUP SYBR GREEN MM                                                         | Fisher Scientific                   | A25778      |
| <b>Experimental Models: Cell Lines</b>                                        |                                     |             |
| PEX1-G843D-PTS1                                                               | A gift from Nancy Braverman         | N/A         |
| Fibroblast cell line from healthy donors                                      | A gift from Nancy Braverman         | N/A         |
| <b>Experimental Models (<i>D.melanogaster</i>): Strains</b>                   |                                     |             |
| w <sup>*</sup> ; PromE-gal4                                                   | Bloomington Drosophila Stock Center | 65405       |
| w <sup>*</sup> ; PromE-gal4, mCD8::GFP                                        | A gift from Alex Gould              | N/A         |
| yw; PromE-GS-gal4;+                                                           | A gift from Heinrich Jasper         | N/A         |
| w; +; PromE800-GS-gal4                                                        | A gift from Heinrich Jasper         | N/A         |
| w[1118]; P{w[+mC]=UAS-GFP.nls}14                                              | Bloomington Drosophila Stock Center | 4775        |
| y1 v1; P{CaryP}attP40                                                         | Bloomington Drosophila Stock Center | 36304       |
| y1 v1; P{CaryP}attP2                                                          | Bloomington Drosophila Stock Center | 36303       |
| Gal4 RNAi: y[1] sc[*] v[1] sev[21]; P{y[+t7.7] v[+t1.8]=VALIUM20-GAL4.2}attP2 | Bloomington Drosophila Stock Center | 35783       |
| w1118                                                                         | A gift from Marc Tatar              | N/A         |



|                                                                                  |                                     |       |
|----------------------------------------------------------------------------------|-------------------------------------|-------|
| ywR                                                                              | A gift from Eric Rulifson           | N/A   |
| ywR;S106-GS-gal4;+                                                               | A gift from Marc Tatar              | N/A   |
| w; Hand4.2-gal4; +                                                               | A gift from Rolf Bodmer             | N/A   |
| w[1118]; P{w[+mC]=UAS-Sod1}12.1                                                  | Bloomington Drosophila Stock Center | 33605 |
| UAS-hop[tuml];+;+                                                                | A gift from Erika Bach              | N/A   |
| w; P{UAS-upd3-GFP}atp40                                                          | A gift from Doug Harrison           | N/A   |
| w[*]; P{w[+mC]=UAS-eYFP.PTS1}6                                                   | Bloomington Drosophila Stock Center | 64248 |
| hop RNAi: y[1] sc[*] v[1]; P{y[+t7.7] v[+t1.8]=TRiP.HMS00761}attP2               | Bloomington Drosophila Stock Center | 32966 |
| Stat92E RNAi: y[1] v[1]; P{y[+t7.7] v[+t1.8]=TRiP.HMS00035}attP2                 | Bloomington Drosophila Stock Center | 33637 |
| dome RNAi: y[1] sc[*] v[1]; P{y[+t7.7] v[+t1.8]=TRiP.HMS01293}attP2              | Bloomington Drosophila Stock Center | 34618 |
| dome RNAi: y[1] v[1]; P{y[+t7.7] v[+t1.8]=TRiP.HMJ21208}attP40                   | Bloomington Drosophila Stock Center | 53890 |
| Cat RNAi : y[1] sc[*] v[1]; P{y[+t7.7] v[+t1.8]=TRiP.HMS00990}attP2              | Bloomington Drosophila Stock Center | 34020 |
| Sod1 RNAi : y[1] sc[*] v[1]; P{y[+t7.7] v[+t1.8]=TRiP.HMS01291}attP2             | Bloomington Drosophila Stock Center | 34616 |
| CG11852 RNAi : y[1] sc[*] v[1] sev[21]; P{y[+t7.7] v[+t1.8]=TRiP.HMC04575}attP40 | Bloomington Drosophila Stock Center | 57193 |
| CG13806 RNAi : y[1] sc[*] v[1] sev[21]; P{y[+t7.7] v[+t1.8]=TRiP.HMC04260}attP40 | Bloomington Drosophila Stock Center | 55965 |
| CG34051 RNAi : y[1] sc[*] v[1] sev[21]; P{y[+t7.7] v[+t1.8]=TRiP.HMC05321}attP40 | Bloomington Drosophila Stock Center | 62848 |
| NimB4 RNAi : y[1] sc[*] v[1] sev[21]; P{y[+t7.7] v[+t1.8]=TRiP.HMC04257}attP40   | Bloomington Drosophila Stock Center | 55963 |
| lectin-46cb RNAi: y[1] v[1]; P{y[+t7.7] v[+t1.8]=TRiP.HMJ22160}attP40            | Bloomington Drosophila Stock Center | 58183 |
| spz4 RNAi: y[1] sc[*] v[1] sev[21]; P{y[+t7.7] v[+t1.8]=TRiP.HMC05037}attP40     | Bloomington Drosophila Stock Center | 60044 |
| sala RNAi: y[1] v[1]; P{y[+t7.7] v[+t1.8]=TRiP.HMJ22251}attP40                   | Bloomington Drosophila Stock Center | 58231 |
| upd2 RNAi: y[1] sc[*] v[1] sev[21]; P{y[+t7.7] v[+t1.8]=TRiP.HMS00948}attP2      | Bloomington Drosophila Stock Center | 33988 |
| CG18628 RNAi: y[1] sc[*] v[1] sev[21]; P{y[+t7.7] v[+t1.8]=TRiP.HMC04437}attP40  | Bloomington Drosophila Stock Center | 56995 |
| CG17633 RNAi: y[1] sc[*] v[1] sev[21]; P{y[+t7.7] v[+t1.8]=TRiP.HMC05036}attP40  | Bloomington Drosophila Stock Center | 60043 |
| Npc2b RNAi: y[1] sc[*] v[1] sev[21]; P{y[+t7.7] v[+t1.8]=TRiP.HMS01682}attP40    | Bloomington Drosophila Stock Center | 38238 |
| CG14259 RNAi: y[1] sc[*] v[1] sev[21]; P{y[+t7.7] v[+t1.8]=TRiP.HMC04578}attP40  | Bloomington Drosophila Stock Center | 57196 |
| CG15201 RNAi: y[1] sc[*] v[1] sev[21]; P{y[+t7.7] v[+t1.8]=TRiP.HMC05343}attP40  | Bloomington Drosophila Stock Center | 62870 |
| TotM RNAi: y[1] sc[*] v[1] sev[21]; P{y[+t7.7] v[+t1.8]=TRiP.HMC05034}attP40     | Bloomington Drosophila Stock Center | 60041 |
| BthD RNAi: y[1] sc[*] v[1] sev[21]; P{y[+t7.7] v[+t1.8]=TRiP.HMC05991}attP40     | Bloomington Drosophila Stock Center | 65094 |
| CecC RNAi: y[1] sc[*] v[1] sev[21]; P{y[+t7.7] v[+t1.8]=TRiP.HMC05727}attP40     | Bloomington Drosophila Stock Center | 64854 |

|                                                                                      |                                     |       |
|--------------------------------------------------------------------------------------|-------------------------------------|-------|
| TotC RNAi: y[1] sc[*] v[1] sev[21]; P{y[+t7.7] v[+t1.8]=TRiP.HMC05166}attP2          | Bloomington Drosophila Stock Center | 62159 |
| TotF RNAi: y[1] sc[*] v[1] sev[21]; P{y[+t7.7] v[+t1.8]=TRiP.HMC06169}attP40         | Bloomington Drosophila Stock Center | 65906 |
| BG642167 RNAi: y[1] sc[*] v[1] sev[21]; P{y[+t7.7] v[+t1.8]=TRiP.HMC04592}attP40     | Bloomington Drosophila Stock Center | 57209 |
| PGRP-SC2 RNAi: y[1] sc[*] v[1] sev[21]; P{y[+t7.7] v[+t1.8]=TRiP.HMC04353}attP40     | Bloomington Drosophila Stock Center | 56915 |
| CG13618 RNAi: y[1] sc[*] v[1] sev[21]; P{y[+t7.7] v[+t1.8]=TRiP.HMC04942}attP40      | Bloomington Drosophila Stock Center | 57749 |
| PGRP-SC1a RNAi: y[1] sc[*] v[1] sev[21]; P{y[+t7.7] v[+t1.8]=TRiP.HMC04566}attP40    | Bloomington Drosophila Stock Center | 57184 |
| Notum RNAi: y[1] sc[*] v[1] sev[21]; P{y[+t7.7] v[+t1.8]=TRiP.HMC04067}attP40        | Bloomington Drosophila Stock Center | 55379 |
| upd3 RNAi (#1): y[1] sc[*] v[1] sev[21]; P{y[+t7.7] v[+t1.8]=TRiP.HMS00646}attP2     | Bloomington Drosophila Stock Center | 32859 |
| upd3 RNAi (#2): y[1] v[1]; P{y[+t7.7] v[+t1.8]=TRiP.HM05061}attP2                    | Bloomington Drosophila Stock Center | 28575 |
| TotA RNAi: y[1] sc[*] v[1] sev[21]; P{y[+t7.7] v[+t1.8]=TRiP.HMC04066}attP2          | Bloomington Drosophila Stock Center | 55378 |
| Ag5r2 RNAi: y[1] sc[*] v[1] sev[21]; P{y[+t7.7] v[+t1.8]=TRiP.HMC04395}attP40        | Bloomington Drosophila Stock Center | 56955 |
| PGRP-SB1 RNAi: y[1] sc[*] v[1] sev[21]; P{y[+t7.7] v[+t1.8]=TRiP.HMC04423}attP40     | Bloomington Drosophila Stock Center | 56983 |
| Pex5 RNAi (#2): y[1] sc[*] v[1]; P{y[+t7.7] v[+t1.8]=TRiP.HMS02546}attP40            | Bloomington Drosophila Stock Center | 42854 |
| Pex5 RNAi (#1): y[1] v[1]; P{y[+t7.7] v[+t1.8]=TRiP.HMJ21920}attP40                  | Bloomington Drosophila Stock Center | 58064 |
| Pex14 RNAi: y[1] sc[*] v[1]; P{y[+t7.7] v[+t1.8]=TRiP.HMC06491}attP40                | Bloomington Drosophila Stock Center | 77180 |
| Pex1 RNAi: y[1] v[1]; P{y[+t7.7] v[+t1.8]=TRiP.HMC03252}attP2                        | Bloomington Drosophila Stock Center | 51497 |
| Pex19 RNAi: y[1] sc[*] v[1] sev[21]; P{y[+t7.7] v[+t1.8]=TRiP.HMC03104}attP2/TM3, Sb | Bloomington Drosophila Stock Center | 50702 |
| ND-75 RNAi (#1) : y[1] sc[*] v[1]; P{y[+t7.7] v[+t1.8]=TRiP.HMS00854}attP2           | Bloomington Drosophila Stock Center | 33911 |
| ND-75 RNAi (#2): y[1] v[1]; P{y[+t7.7] v[+t1.8]=TRiP.JF02791}attP2                   | Bloomington Drosophila Stock Center | 27739 |
| Sod2 RNAi: y[1] v[1]; P{y[+t7.7] v[+t1.8]=TRiP.JF01989}attP2                         | Bloomington Drosophila Stock Center | 25969 |
| Prx5 RNAi: y[1] sc[*] v[1]; P{y[+t7.7] v[+t1.8]=TRiP.HMC05872}attP40                 | Bloomington Drosophila Stock Center | 64998 |
| Dhap-at RNAi (#1): y[1] sc[*] v[1]; P{y[+t7.7] v[+t1.8]=TRiP.HMC03654}attP40         | Bloomington Drosophila Stock Center | 52914 |
| Dhap-at KO (#2): y[1] sc[*] v[1] sev[21]; P{y[+t7.7] v[+t1.8]=TKO.GS00835}attP40     | Bloomington Drosophila Stock Center | 77048 |
| ADPS RNAi: y1 sc* v1 sev21; P{TRiP.HMS01339}attP2                                    | Bloomington Drosophila Stock Center | 34350 |
| Acox57D-d RNAi: y[1] v[1]; P{y[+t7.7] v[+t1.8]=TRiP.HMJ30208}attP40                  | Bloomington Drosophila Stock Center | 63641 |
| Acox57D-p RNAi: y[1] sc[*] v[1]; P{y[+t7.7] v[+t1.8]=TRiP.HMC05604}attP40            | Bloomington Drosophila Stock Center | 64585 |

|                                                                                            |                                          |                               |
|--------------------------------------------------------------------------------------------|------------------------------------------|-------------------------------|
| kay RNAi: y[1] sc[*] v[1]; P{y[+t7.7] v[+t1.8]=TRiP.HMS00254}attP2                         | Bloomington Drosophila Stock Center      | 33379                         |
| Jra RNAi: y[1] v[1]; P{y[+t7.7] v[+t1.8]=TRiP.JF01184}attP2                                | Bloomington Drosophila Stock Center      | 31595                         |
| UAS-dCAS9-VPR: w[*]; P{w[+mC]=UAS-3xFLAG.dCas9.VPR}attP40; P{GAL4-Mhc.W}MHC-82/TM6B, Tb[1] | Bloomington Drosophila Stock Center      | 67044                         |
| Pex5 gRNA: y[1] sc[*] v[1] sev[21]; P{y[+t7.7] v[+t1.8]=TOE.GS01923}attP40                 | Bloomington Drosophila Stock Center      | 78666                         |
| 2XStat92E-GFP: w[1118]; P{w[+mC]=2XStat92E-GFP}6-1                                         | Bloomington Drosophila Stock Center      | 26196                         |
| 10XSTAT92E-GFP on (II) and (III) chromosome                                                | Douglas A Harrison                       | N/A                           |
| TRE-DsRedT4 reporter: w[*]; P{y[+t7.7] w[+mC]=TRE-DsRedT4}attP40                           | Bloomington Drosophila Stock Center      | 59011                         |
| <b>Oligonucleotides (see Table S2 for sequences)</b>                                       |                                          |                               |
| RpL32                                                                                      | This paper                               | N/A                           |
| upd1                                                                                       | This paper                               | N/A                           |
| upd2                                                                                       | This paper                               | N/A                           |
| upd3                                                                                       | This paper                               | N/A                           |
| puc                                                                                        | This paper                               | N/A                           |
| yki                                                                                        | This paper                               | N/A                           |
| Mad                                                                                        | This paper                               | N/A                           |
| kay                                                                                        | This paper                               | N/A                           |
| Jra                                                                                        | This paper                               | N/A                           |
| Socs36E                                                                                    | This paper                               | N/A                           |
| Pex5                                                                                       | This paper                               | N/A                           |
| Pex1                                                                                       | This paper                               | N/A                           |
| Pex14                                                                                      | This paper                               | N/A                           |
| Pex19                                                                                      | This paper                               | N/A                           |
| ND-75                                                                                      | This paper                               | N/A                           |
| IL-6                                                                                       | This paper                               | N/A                           |
| GAPDH                                                                                      | This paper                               | N/A                           |
| <b>Others</b>                                                                              |                                          |                               |
| Borosilicate Glass Capillary Tubes                                                         | WPI                                      | #1B100F-4                     |
| Sutter Puller                                                                              | Sutter                                   | Model P-97                    |
| Hamamatsu ORCA-Flash 4.0 digital camera                                                    | Hamamatsu                                | ORCA-Flash 4.0                |
| Olympus BX51WI upright microscope                                                          | Olympus                                  | BX51WI                        |
| Olympus FV3000 Confocal Laser Scanning Microscope                                          | Olympus                                  | FV3000                        |
| Quantstudio 3 Real-Time PCR System                                                         | Thermo Fisher Scientific                 | Quantstudio 3 (version 1.2.1) |
| <b>Software</b>                                                                            |                                          |                               |
| ImageJ                                                                                     | NIH Image                                | Version 1.49                  |
| HCI imaging software                                                                       | Hamamatsu Photonics                      | Version 4.6.1                 |
| GraphPad Prism                                                                             | Prism                                    | Version 6.07                  |
| Bio-Rad ChemiDoc                                                                           | Bio-Rad                                  | Version 6.0.1                 |
| CellSens                                                                                   | Olympus                                  | Version 1.16                  |
| SOHA                                                                                       | Developed by Rolf Bodmer and Karen Ocorr | x86                           |

**Supplementary Table 2: Primer list**

| <b>Oligonucleotides</b> | <b>Sequence 5'-3'</b>    | <b>Species</b>                 |
|-------------------------|--------------------------|--------------------------------|
| upd1 F                  | CGCAGCCTAACAGTAGCCA      | <i>Drosophila melanogaster</i> |
| upd1 R                  | CGCTTTAGGGCAATCGTGGA     | <i>Drosophila melanogaster</i> |
| upd2 F                  | CTTAAACGCCAGCCAACAGAG    | <i>Drosophila melanogaster</i> |
| upd2 R                  | TGAATGGCATCACGACGCT      | <i>Drosophila melanogaster</i> |
| upd3 <sup>#1</sup> F    | AAAACGGCCAGAACCAGGAA     | <i>Drosophila melanogaster</i> |
| upd3 <sup>#1</sup> R    | CATGGCCAAGGCGAGTAAGA     | <i>Drosophila melanogaster</i> |
| upd3 <sup>#2</sup> F    | AATGCCAGCAGTACGCATCT     | <i>Drosophila melanogaster</i> |
| upd3 <sup>#2</sup> R    | TTCTGCAGGATCCTTTGGCG     | <i>Drosophila melanogaster</i> |
| puc F                   | ATCGAAGATGCACGGAAAAC     | <i>Drosophila melanogaster</i> |
| puc R                   | CAGGGAGAGCGACTTGTACC     | <i>Drosophila melanogaster</i> |
| yki F                   | AACTAGGCGCCTTGCCG        | <i>Drosophila melanogaster</i> |
| yki R                   | TCGCTCGGCCATCAAGATTT     | <i>Drosophila melanogaster</i> |
| Mad F                   | GTGCGTGTGAGTGAAAGCTA     | <i>Drosophila melanogaster</i> |
| Mad R                   | GGTATTGGAGTAGCTGCCGT     | <i>Drosophila melanogaster</i> |
| kay F                   | CGCAACATTGCGCTATTTTCAA   | <i>Drosophila melanogaster</i> |
| kay R                   | GCTTTTGTGTAATCGTTTTGGGT  | <i>Drosophila melanogaster</i> |
| Jra F                   | ATTCCGCCGCCAATAACA       | <i>Drosophila melanogaster</i> |
| Jra R                   | CTCGTCCTTAATCACCGAGAAG   | <i>Drosophila melanogaster</i> |
| Socs36E F               | AGTCGCAGCAGTAAAGCACT     | <i>Drosophila melanogaster</i> |
| Socs36E R               | TTAATCCTCGGATGGCGTCG     | <i>Drosophila melanogaster</i> |
| Pex5 F                  | CAACCTTACACACCCACATGAC   | <i>Drosophila melanogaster</i> |
| Pex5 R                  | GCAGCGATCTCCAGAGTTAT     | <i>Drosophila melanogaster</i> |
| Pex1 F                  | GATCTGGTCAAGTGTGCGCT     | <i>Drosophila melanogaster</i> |
| Pex1 R                  | AGCACACTGCCCGATATCTTT    | <i>Drosophila melanogaster</i> |
| Pex14 F                 | CATTGGATCCCAATTGCACGC    | <i>Drosophila melanogaster</i> |
| Pex14 R                 | AACAGGTAGGGCGCAATGTA     | <i>Drosophila melanogaster</i> |
| Pex19 F                 | TTCATGGAGGGCATGATGCAG    | <i>Drosophila melanogaster</i> |
| Pex19 R                 | TGTCCTCAGCGGAGAGCTT      | <i>Drosophila melanogaster</i> |
| ND-75 F                 | GTACCCGGCACCCTGTC        | <i>Drosophila melanogaster</i> |
| ND-75 R                 | AGCAGAATCTGGGTATCTCCAC   | <i>Drosophila melanogaster</i> |
| RpL32 F                 | AAGAAGCGCACCAAGCACTTCATC | <i>Drosophila melanogaster</i> |
| RpL32 R                 | TCTGTTGTCGATACCCTTGGGCTT | <i>Drosophila melanogaster</i> |
| IL-6 F                  | CCACACAGACAGCCACTCA      | <i>Homo sapiens</i>            |
| IL-6 R                  | CATCCATCTTTTTTCAGCCATCT  | <i>Homo sapiens</i>            |
| GAPDH F                 | ACCCACTCCTCCACCTTTG      | <i>Homo sapiens</i>            |
| GAPDH R                 | CTCTTGCTCTTGCTGGG        | <i>Homo sapiens</i>            |
